# Supplementary material for: SIRT2-mediated deacetylation activates USP22 catalytic function for PD-L1 protein stabilization and tumor immune escape
Source: JCI journal article supplement (doi:10.1172/jci198270), 2026-06-02

# Figure. 1

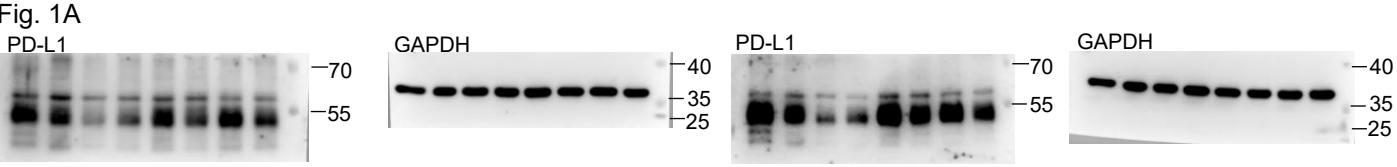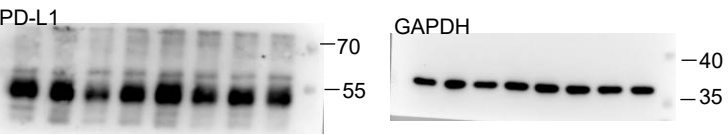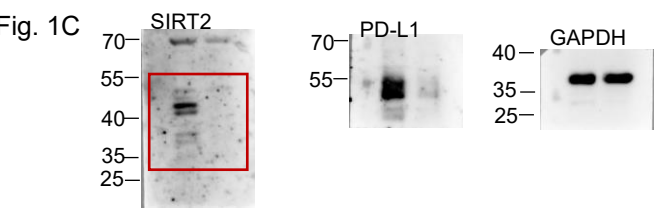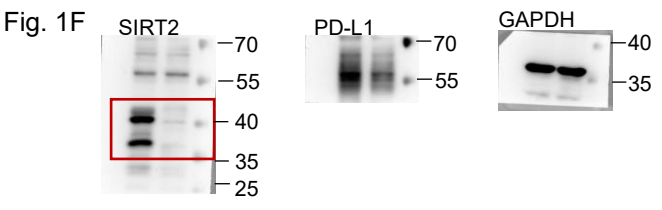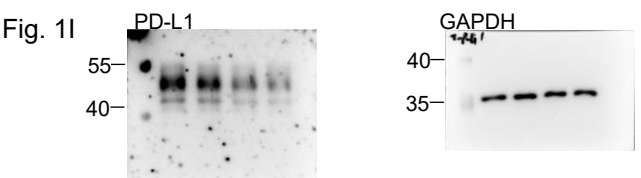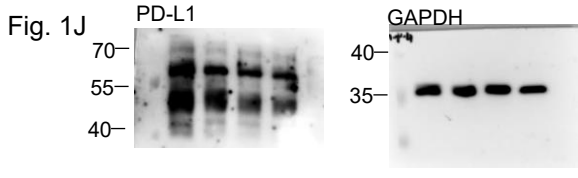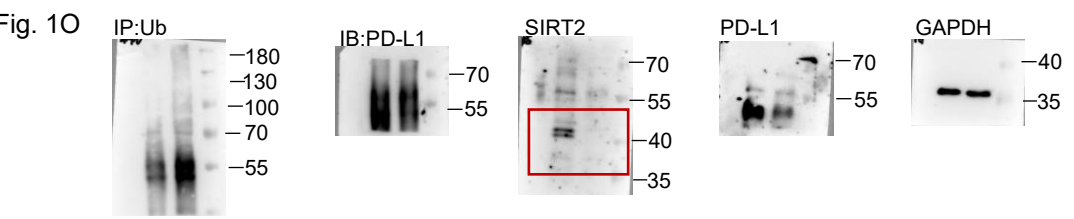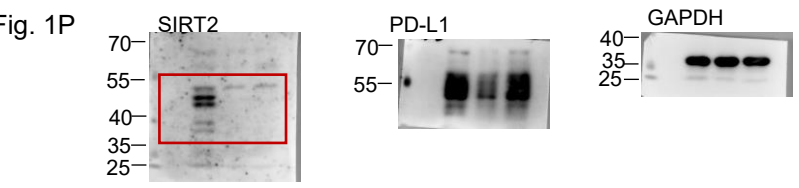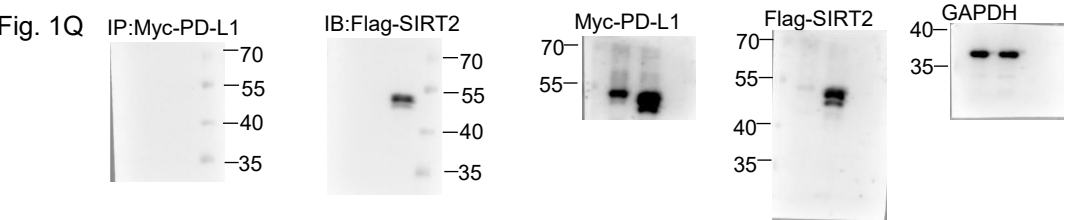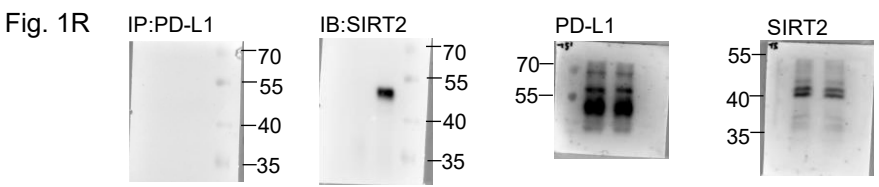

# Figure. 2

Fig. 2A

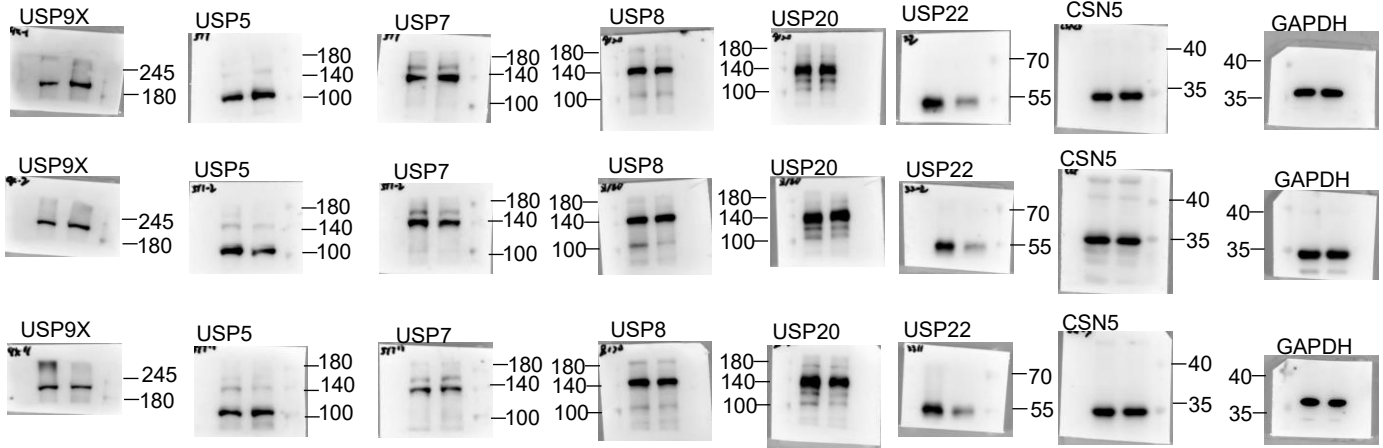

Fig. 2C

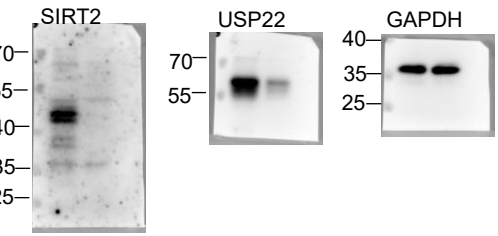

Fig. 2D

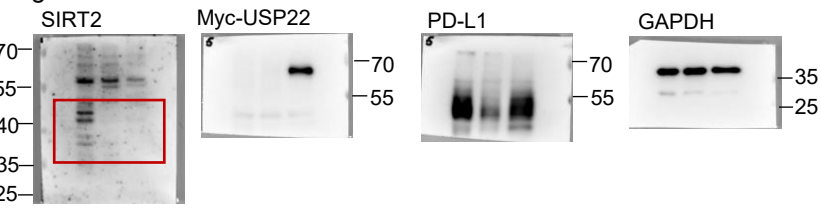

Fig. 2H

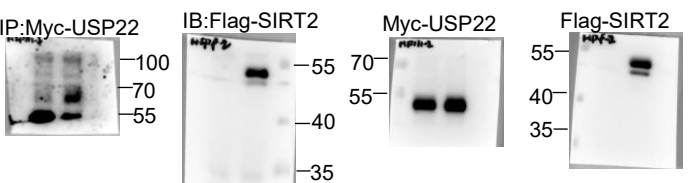

Fig. 2I

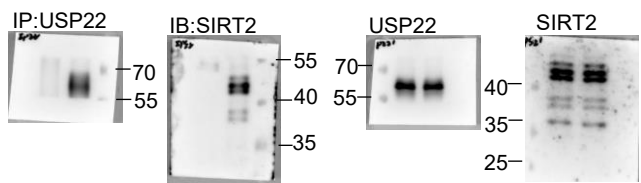

Fig. 2L

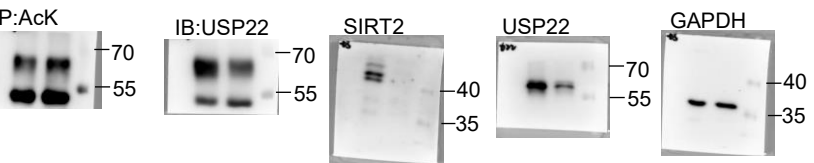

Fig. 2M

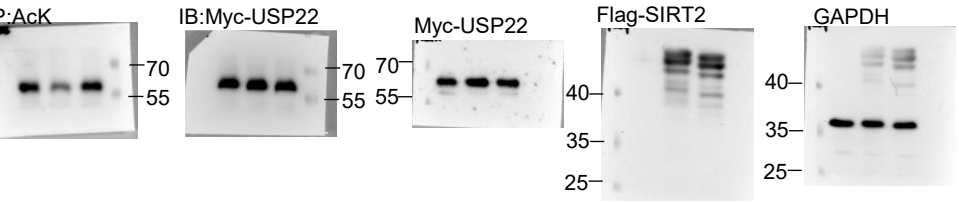

Fig. 2N

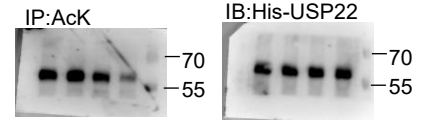

# Figure. 3

Fig. 3A

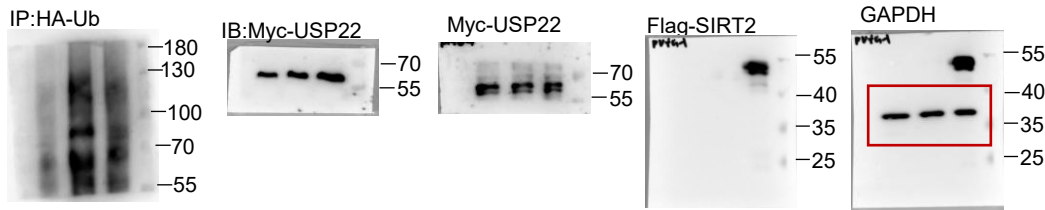

Fig. 3B

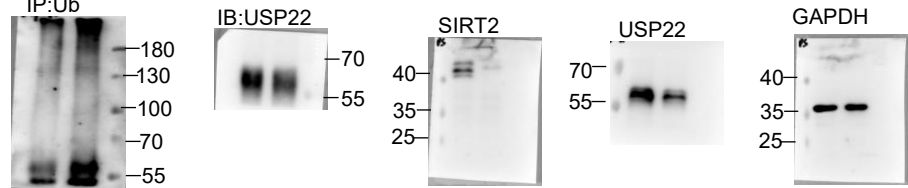

Fig. 3C

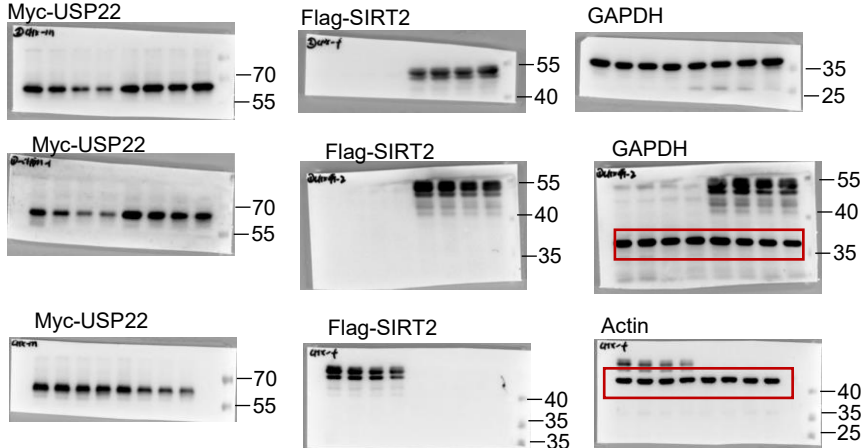

Fig. 3E

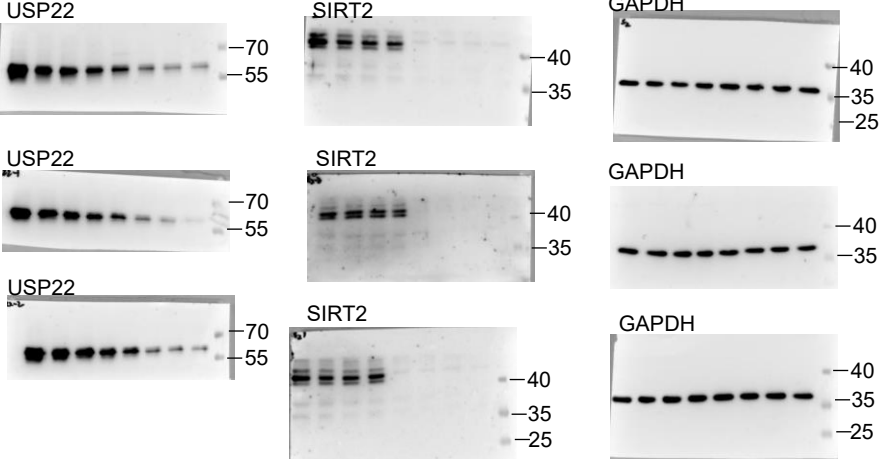

Fig. 3G

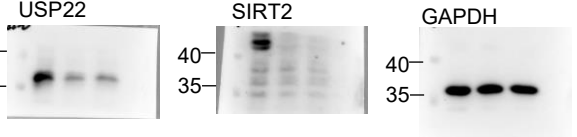

Fig. 3H

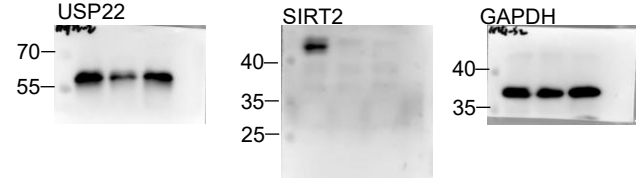

Fig. 3I

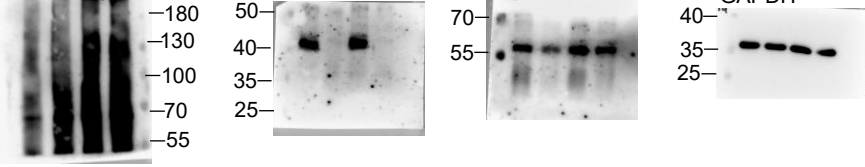

# Figure. 4

**Fig. 4A**

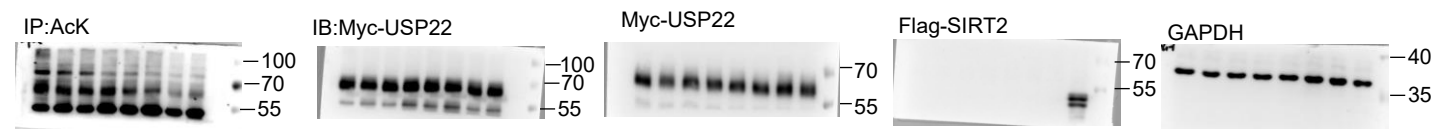

**Fig. 4B**

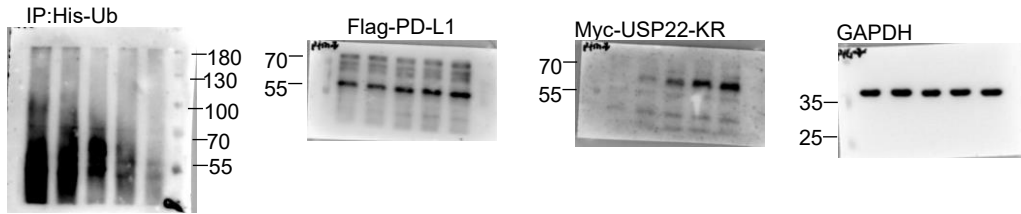

**Fig. 4C**

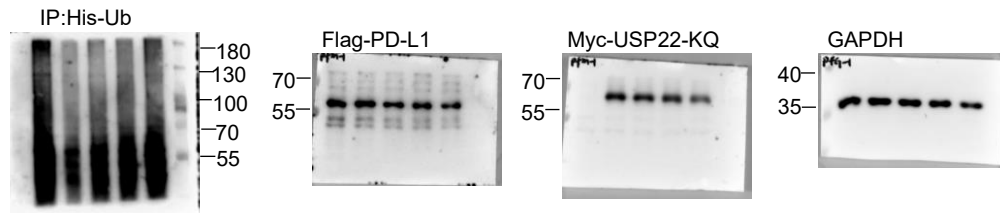

# Figure. 5

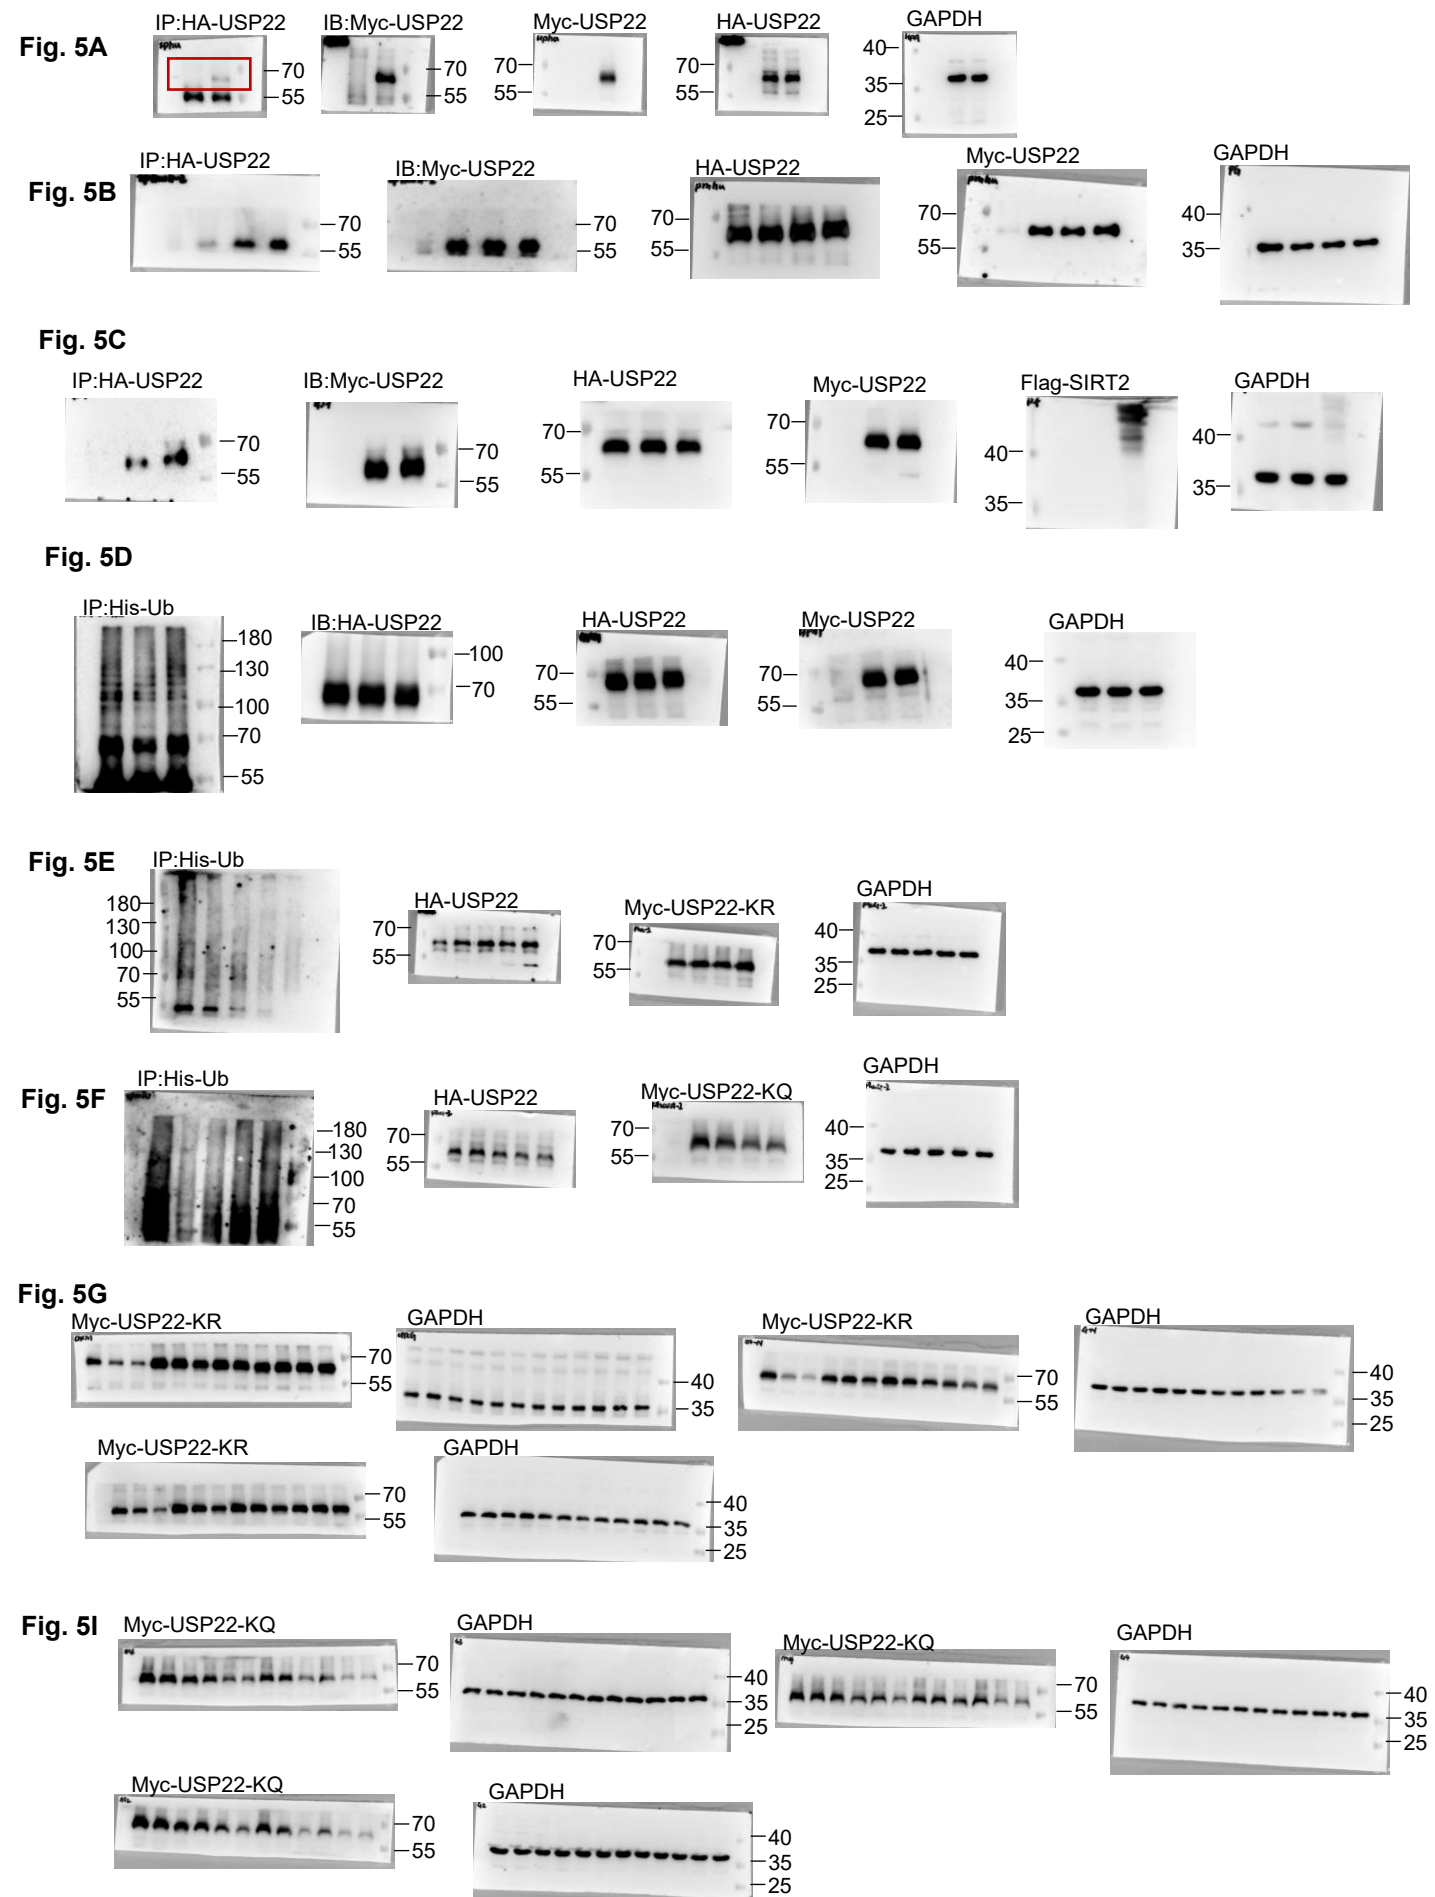

**Fig. 5K**

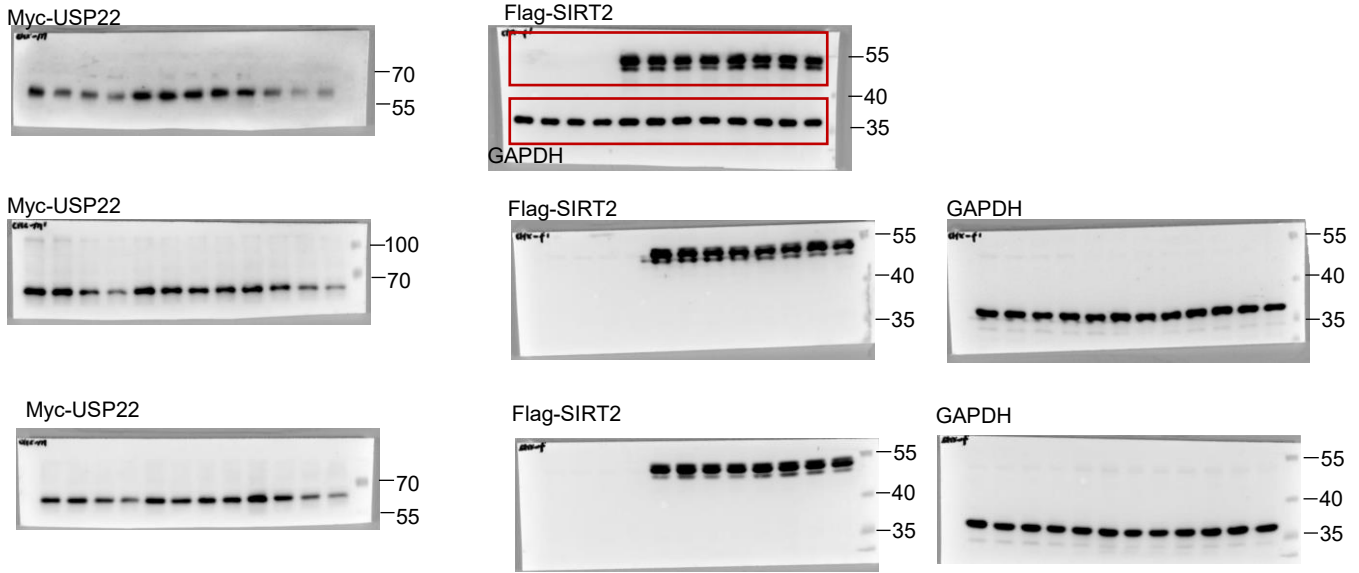

**Figure. 7**

**Fig. 7E**

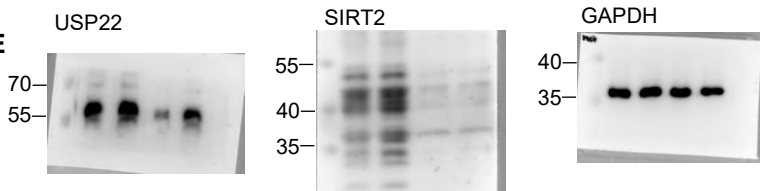

**Supplemental Figure**

**Figure S2A**

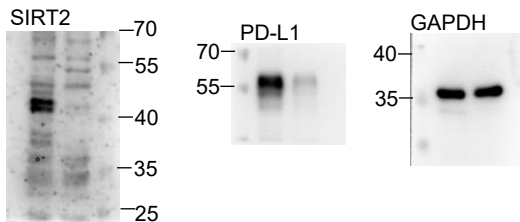

**Figure S2F**

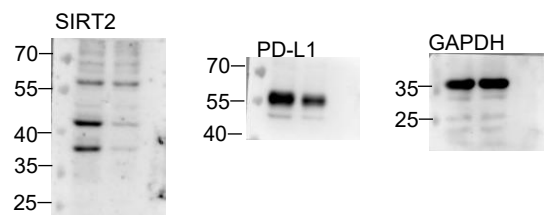

**Figure S2K**

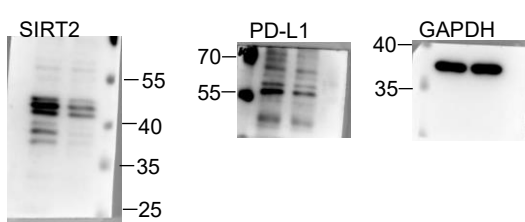

**Figure S3**

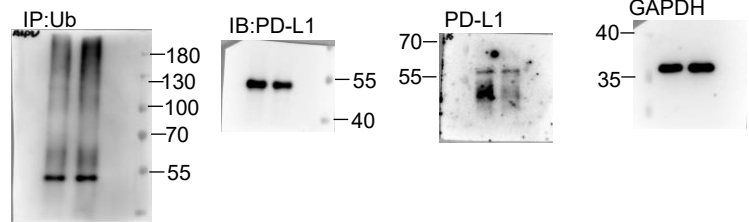

**Figure S4A**

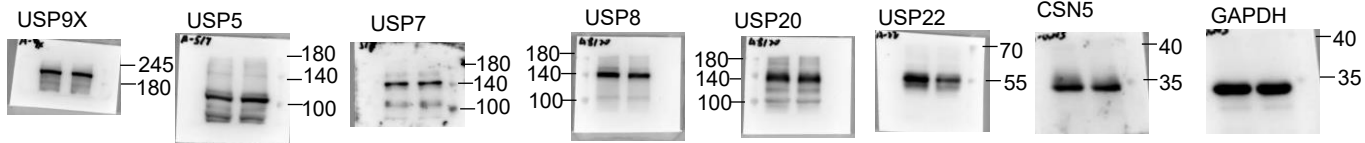

**Figure S4B**

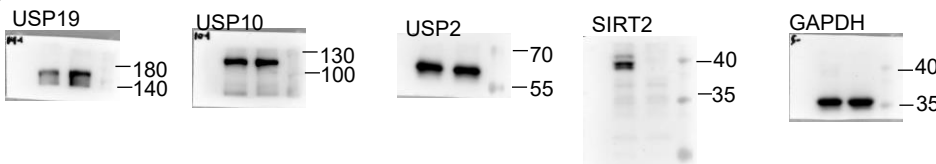

**Figure S4C**

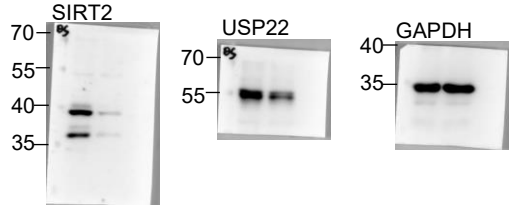

**Figure S5A**

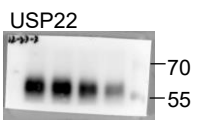

**Figure S5B**

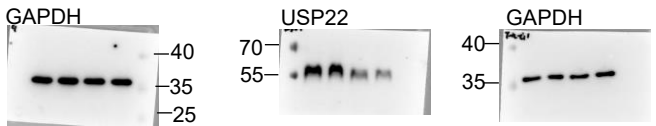

**Figure S5C**

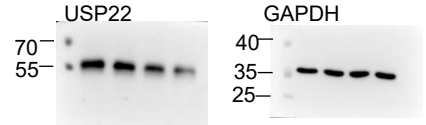

**Figure S6A**

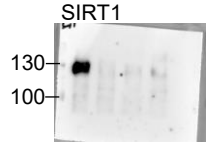

**Figure S6B**

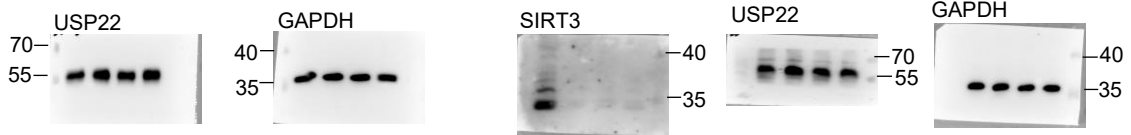

**Figure S8A**

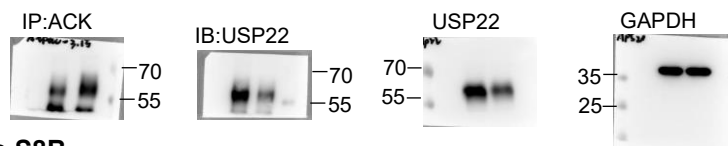

**Figure S8B**

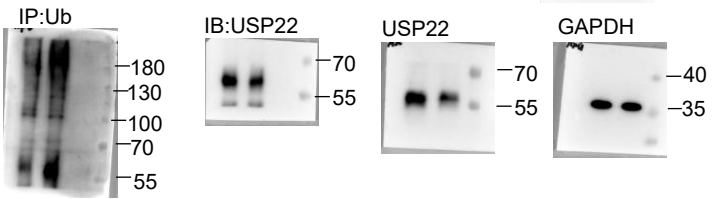

**Figure S8C**

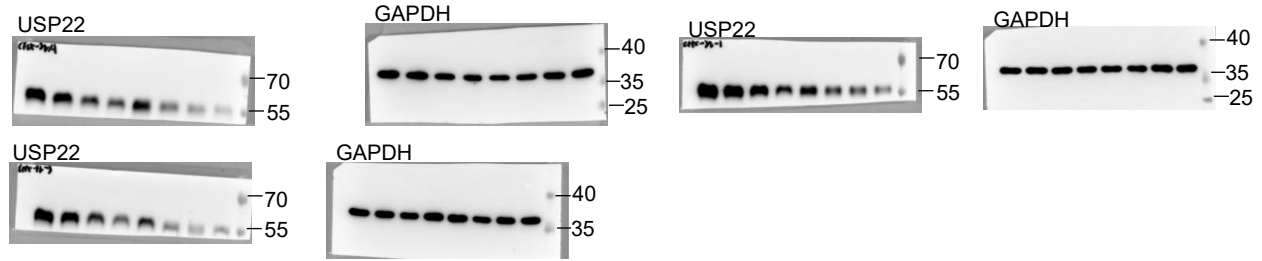

Supplement: sd1 [file 1]
